# Supplementary material for: Genome-Wide Identification of Putative MicroRNAs in Cassava (Manihot esculenta Crantz) and Their Functional Landscape in Cellular Regulation
Source: Biomed Res Int. 2019 Jun 19;2019:2019846. doi: 10.1155/2019/2019846 (PMC6607727; doi:10.1155/2019/2019846)
Supplement: Supplementary Materials — Figure S1: the scheme of miRNAs identification work flow. (A) The framework describes miRNA identification processes in this work (gray box), which were mimicked from miRNA biogenesis in plant species (green box). Predicted loci were termed for the regions that contain at least one miRNA in their sequences. miRNA duplexes, which generally are a double stranded RNA (composing of one guide strand and one passenger strand, i.e., miRNA and miRNA∗, respectively), were herein referred to the stem of the stem-loop structure of pre-miRNAs. Mature miRNA candidates were then defined in this context as the single-arm sequences of the predefined miRNA duplexes. (B) The example of the miRNA duplex identification from stem-loop structure of the predicted loci (AY0000096). The miRNA duplexes (predicted according to the criteria in the gray box) were highlighted as yellow shade, where mature miRNA candidates were presumed to locate in both strands of the duplexes. Table S1: cassava RNA sequencing data from six publications supporting the existence of putative mature miRNAs. Table S2: MicroRNA densities in each organism. Table S3: cassava miRNAs that first identify in this work (black sequences) and their conserved miRNA of organisms in miRBase Release21 (blue sequences). Table S4: the functions of new isomiRs predicted by psRNATarget. [file 2019846.f1.zip › mat.2019846.v2.xlsx]

## Sheet: S1
Supplementary table 1
mature miRNA candidates mapping with expression
		HeteroMirPred score cut off = 0.5, read depth >=1							HeteroMirPred score cut off = 1, read depth>=1							HeteroMirPred score cut off = 1, read depth>=10							HeteroMirPred score cut off = 1, read depth>=100
		Number of reads supporting our predicted miRNAs	Non-conserved miRNA		Conserved miRNA		Total		Number of reads supporting our predicted miRNAs	Non-conserved miRNA		Conserved miRNA		Total		Number of reads supporting our predicted miRNAs	Non-conserved miRNA		Conserved miRNA		Total		Number of reads supporting our predicted miRNAs	Non-conserved miRNA		Conserved miRNA		Total
			Number of putative miRNAs with expression support	% of putative miRNAs with expression support from total putative miRNAs	Number of putative miRNAs with expression support	% of putative miRNAs with expression support from total putative miRNAs	Number of putative miRNAs with expression support	% of putative miRNAs with expression support from total putative miRNAs		Number of putative miRNAs with expression support	% of putative miRNAs with expression support from total putative miRNAs	Number of putative miRNAs with expression support	% of putative miRNAs with expression support from total putative miRNAs	Number of putative miRNAs with expression support	% of putative miRNAs with expression support from total putative miRNAs		Number of putative miRNAs with expression support	% of putative miRNAs with expression support from total putative miRNAs	Number of putative miRNAs with expression support	% of putative miRNAs with expression support from total putative miRNAs	Number of putative miRNAs with expression support	% of putative miRNAs with expression support from total putative miRNAs		Number of putative miRNAs with expression support	% of putative miRNAs with expression support from total putative miRNAs	Number of putative miRNAs with expression support	% of putative miRNAs with expression support from total putative miRNAs	Number of putative miRNAs with expression support	% of putative miRNAs with expression support from total putative miRNAs
RNAseq	Chen et al., 2015	9156182	260476	9.14	32	0	260508	9.14	341266	16085	10.5745	11	0.00723156	16096	10.5817	220332	1129	0.742221	4	0.00262966	1133	0.744851	108984	84	0.0552228	2	0.00131483	86	0.0565377
	Liu et al., 2014	21274	306	0.01	0	-	306	0.01	146	19	0.0124909	0	0	19	0.0124909	70	2	0.00131483	0	0	2	0.00131483	-	0	0	0	0	0	0
	Wang et al, 2014	87800014	397544	13.95	62	0	397606	13.95	5052551	27068	17.7949	11	0.00723156	27079	17.8021	4746936	8120	5.33821	4	0.00262966	8124	5.34084	3224039	1920	1.26224	1	0.000657415	1921	1.26289
	Xia et al., 2014	3212469	181558	6.37	5	0	181563	6.37	237918	10824	7.11586	10	0.00657415	10834	7.12243	201349	388	0.255077	3	0.00197224	391	0.257049	178616	25	0.0164354	0	0	25	0.0164354
	Zeng et al., 2014	56469	11780	0.41	2	0	11782	0.41	3526	561	0.36881	1	0.000657415	562	0.369467	2497	19	0.0124909	0	0	19	0.0124909	1875	3	0.00197224	0	0	3	0.00197224
Small RNA	Pérez-Quintero et al., 2012	103214	38954	1.37	36	0	38990	1.37	30167	8378	5.50782	30	0.0197224	8408	5.52754	13060	681	0.447699	2	0.00131483	683	0.449014	1966	6	0.00394449	0	0	6	0.00394449
	Chen et al., 2015	1097173	110279	3.87	9	0	110288	3.87	319149	22272	14.6419	9	0.00591673	22281	14.6479	276413	5635	3.70453	9	0.00591673	5644	3.71045	130519	628	0.412856	0	0	628	0.412856
	Pooled data	101446795	803884	28.2	87	0	803971	28.2	5984723	63489	41.7386	30	0.0197224	63519	41.7583	5460657	14878	9.78102	14	0.00920381	14892	9.79022	3645999	2639	1.73492	3	0.00197224	2642	1.73689
		Number of predicted loci containing mature miRNA candidates	Number of mature miRNA candidates
	HeteroMirPred (cut off = 1)	78022	152111
	HeteroMirPred (cut off = 0.9)	80918
	HeteroMirPred (cut off = 0.8)	114688
	HeteroMirPred (cut off = 75)	336329
	HeteroMirPred (cut off = 0.5, default)	1033040	2850606
	References
	1. Liu2014: Why mosaic? Gene expression profiling of African cassava mosaic virus-infected cassava reveals the effect of chlorophyll degradation on symptom development.
	2. Zeng2014: Chilling acclimation provides immunity to stress by altering regulatory networks and inducing genes with protective functions in Cassava
	3. Xia2014: Endogenous small-noncoding RNAs and their roles in chilling response and stress acclimation in Cassava
	4. Chen2015: Potential functions of microRNAs in starch metabolism and development revealed by miRNA transcriptome profiling of cassava cultivars and their wild
	5. Wang2014: Cassava genome from a wild ancestor to cultivated varieties

## Sheet: S2
Supplementary Table S2
miRNA density in each organism
Organism	Genome size* (nt)	Intergenic region					Genic region
		Number of putative pre-miRNAs	Length of intergenic region in genome (nt)	% in genome	Population Density	log(Population Density)	Number of putative pre-miRNAs	Length of genic region in genome (nt)	% in genome	Population Density	log(Population Density)
Human**	3230538373	20	6030356630	93.3336	3.31655	0.520687	1861	430720116	6.66638	4320.67	3.63555
C. Elegance**	100286401	2	159714157	79.629	12.5224	1.09769	248	40858645	20.371	6069.71	3.78317
Arabidopsis**	119667750	302	198712887	83.0269	1519.78	3.18178	23	40622613	16.9731	566.187	2.75296
Rice**	374471240	544	693396467	92.5834	784.544	2.89462	48	55546013	7.41659	864.148	2.93659
Ricinus**	350631014	60	317728506	90.6162	188.84	2.2761	3	32902508	9.3838	91.1785	1.95989
Glycine max**	978495272	500	886466425	90.5949	564.037	2.75131	113	92028847	9.40514	1227.88	3.08915
Cassava**	532507280	152	1024374926	96.1841	148.383	2.17138	1	40639634	3.81588	24.6065	1.39105
- Cassava in this work		70716***	1024374926	96.1841	69033.3	4.83906	7306***	40639634	3.81588	179775	5.25473
- Patanun et al. 2012		150	1024374926	96.1841	146.431	2.16563	1	40639634	3.81588	24.6065	1.39105
- Pérez-Quintero et al. 2012		125	1024374926	96.1841	122.026	2.08645	1	40639634	3.81588	24.6065	1.39105
- Ballén-Taborda et al. 2013		870	1024374926	96.1841	849.298	2.92906	81	40639634	3.81588	1993.13	3.29954
- Wang et al. 2014		110	1024374926	96.1841	107.383	2.03093	6	40639634	3.81588	147.639	2.1692
- Xia et al. 2014		195	1024374926	96.1841	190.36	2.27958	7	40639634	3.81588	172.246	2.23615
*source of genome length
Human	Homo sapiens (assembly GRCh38.p5)
C. elegance	Caenorhabditis elegans (assembly WBcel235): Genome sequence of the nematode C. elegans: a platform for investigating biology. C. elegans Sequencing Consortium Science 1998 Dec 11
Arabidopsis	Lamesch P, Berardini TZ, Li D, Swarbreck D, Wilks C, Sasidharan R, Muller R, Dreher K, Alexander DL, Garcia-Hernandez M, Karthikeyan AS, Lee CH, Nelson WD, Ploetz L, Singh S, Wensel A, Huala E, The Arabidopsis Information Resource (TAIR): improved gene annotation and new tools., Nucleic acids research. 2012 Jan ; 40 Database issue D1202-10
rice	Ouyang S, Zhu W, Hamilton J, Lin H, Campbell M, Childs K, Thibaud-Nissen F, Malek RL, Lee Y, Zheng L, Orvis J, Haas B, Wortman J, Buell CR, The TIGR Rice Genome Annotation Resource: improvements and new features., Nucleic acids research. 2007 Jan ; 35 Database issue D883-7
cassava	Prochnik S, Marri PR, Desany B, Rabinowicz PD, Kodira C, Mohiuddin M, Rodriguez F, Fauquet C, Tohme J, Harkins T, Rokhsar DS, Rounsley S, The Cassava Genome: Current Progress, Future Directions., Tropical plant biology. 2012 Mar ; 5 1 88-94
** Number of miRNAs collected from miRBase Release 21
*** Number of putative loci

## Sheet: S3
Supplementary Table S3
Cassava miRNAs that first identify in this work (black sequences) and their conserved miRNA of organisms in miRBase Release21 (blue sequences)
Cassava miRNA family	Conserved organism	Mature miRNA sequence	Member number
MIR1533	Glycine max	AUAAUAAAAAUAAUAAUGA
		- - AAUAAAAAUAAUAAUG -	2
		- UAAUAAAAAUAAUAAU - -	1
MIR384	Solanum tuberosum	AGGGGGCCAAAGUGCCAAAC
		AGGUGGCCAGCAUGCCAAAC	1

## Sheet: S4
Supplementary Table S4
The functions of new isomiRs
family	miRNA name	target gene	gene name	description
miR156	ay0909608-3p	cassava4.1_000732m.g	ATSPS1F,SPS1F	sucrose_phosphate_synthase_1F
		cassava4.1_003408m.g	AFB5	auxin_F-box_protein_5
miR160	ay0901135-3p	cassava4.1_000732m.g	ATSPS1F,SPS1F	sucrose_phosphate_synthase_1F
miR166	ay0443275-5p	cassava4.1_005632m.g	PEPKR1	phosphoenolpyruvate_carboxylase-related_kinase_1
		cassava4.1_013788m.g	ATPPCK1,PPCK1	phosphoenolpyruvate_carboxylase_kinase_1
		cassava4.1_022217m.g	ATPPCK1,PPCK1	phosphoenolpyruvate_carboxylase_kinase_1
		cassava4.1_033112m.g	VGDH1	Plant_invertase/pectin_methylesterase_inhibitor_superfamily
miR169	ay0188554-3p	-	-	-
	ay0188551-5p	-	-	-
	ay1025730-5p	-	-	-
miR171	ay0701466-5p	-	-	-
miR396	ay0705478-3p	cassava4.1_002913m.g		Plant_neutral_invertase_family_protein
		cassava4.1_022952m.g	AtSTP14,STP14	sugar_transporter_14
miR399	ay0786551-3p	cassava4.1_001923m.g	ARF8,ATARF8	auxin_response_factor_8
		cassava4.1_005313m.g		Plant_invertase/pectin_methylesterase_inhibitor_superfamily
